# Supplementary material for: Expression of Vitis amurensis NAC26 in Arabidopsis enhances drought tolerance by modulating jasmonic acid synthesis
Source: PubMed Central journal article supplement (PMC4861026; doi:10.1093/jxb/erw122), 2016-05-07
Supplement: supp_erw122_supplementary_tables_S1_S2__S4__figures_S1_S4.pdf [file supp_erw122_supplementary_tables_S1_S2__S4__figures_S1_S4.pdf]

Title:

Expression of *Vitis amurensis* NAC26 in Arabidopsis enhances drought tolerance by modulating jasmonic acid synthesis

Linchuan Fang<sup>§</sup>, Lingye Su<sup>§</sup>, Xiaoming Sun, Xinbo Li, Mengxiang Sun, Sospeter Karanja Karungo, Shuang Fang, Jinfang Chu, Shaohua Li<sup>\*</sup>, Haiping Xin<sup>\*</sup>

## Supplementary data

**Supplementary Table S1.** Sequence of qRT-PCR primer pairs used in this study.

| Name              | Orientation | Sequence (5'-3')       |
|-------------------|-------------|------------------------|
| <i>VaNAC26</i>    | Forward     | TGATTGGGTGCTATGTAGG    |
|                   | Reverse     | TTTCACTTGGTGCTGCTC     |
| <i>VvActin7</i>   | Forward     | CTTGCATCCCTCAGCACCTT   |
|                   | Reverse     | TCCTGTGGACAATGGATGGA   |
| <i>VvGADPH</i>    | Forward     | GGTATTAGGAACCCAGAGGAGA |
|                   | Reverse     | CAACAACGAACATAGGAGCAT  |
| <i>PR5</i>        | Forward     | GTGCTTGCTCTGCCTTCA     |
|                   | Reverse     | CTGGTTGGGTCGTCGTAA     |
| <i>MYB47</i>      | Forward     | CGTTTGTGATTGGCGTTC     |
|                   | Reverse     | GGCTGCCCACCTGTTTCC     |
| <i>COR414-TM1</i> | Forward     | GCTTAGGTTATCGGGTGA     |
|                   | Reverse     | CGGAGCAGCATAACAGAC     |
| <i>NATA1</i>      | Forward     | GCACCAGAGCCAAACACT     |
|                   | Reverse     | TGGAGGCAAGACCAGACT     |
| <i>COR15A</i>     | Forward     | CTTCCACAGCGGAGCCA      |
|                   | Reverse     | TTGCCGTCACCTTTAGCG     |
| <i>SWEET4</i>     | Forward     | GTTGCGAGAAACATTGCC     |
|                   | Reverse     | GCTTTGTACTCCTCCACCTT   |
| <i>14A</i>        | Forward     | CCCCAACACGCAGCATAC     |
|                   | Reverse     | CGGCAATGTCCAAAGTCT     |
| <i>BMY1</i>       | Forward     | CGTTGGGAGTTGTGAATG     |
|                   | Reverse     | GAACAGCGTTTTGTAGGC     |
| <i>PDF1.2</i>     | Forward     | GCTTCCATCATCACCTT      |
|                   | Reverse     | ATGTCCCACCTGGCTTCT     |
| <i>LTP4</i>       | Forward     | TGGCACAGTGGCAAGTAG     |

---

|               |         |                        |
|---------------|---------|------------------------|
|               | Reverse | GAGATGGGATAGGGGATG     |
| <i>LTP3</i>   | Forward | GGCTTTCGCTTTGAGGT      |
|               | Reverse | TTGTTGGCGGTCTGGTGT     |
| <i>Actin2</i> | Forward | TTACCCGATGGGCAAGTCA    |
|               | Reverse | AAACGAGGGCTGGAACAAGA   |
| <i>UBQ10</i>  | Forward | CACACTCCACTTGGTCTTGCCT |
|               | Reverse | TGGTCTTCCGGTGAGAGTCTCA |

---

**Supplementary Table S2. Features of two activation domains in VaNAC26 protein**

| number   | location  | MV     | pI   | Stable index | Aliphatic index | GRAVY  |
|----------|-----------|--------|------|--------------|-----------------|--------|
| Domain 1 | 135-184aa | 5856.7 | 9.65 | 39.84        | 72.00           | -1.176 |
| Domain 2 | 231-282aa | 5954.6 | 4.43 | 26.36        | 69.23           | -0.523 |

135-184aa: SDSRPRPKKHNGSMRLDDWVLCRIYKKKHVGRILEEKEENLGPQIPVTNS

231-282aa: TISNIAGTDPPGVDFELFQLPCQYNDSTKFQVNQNHIPNQPLFVNPVYEFQ

MV: molecular weight; pI: isoelectric point; GRAVY: grand average of hydropathicity.

**Supplementary Table S3. Microarray-based differential expression gene analysis and its functional annotations in WT and *VaNAC26*-OE lines.** (.xls document)

The numbers in red and green represent the fold changes of upregulated and downregulated genes in specific comparisons, respectively. The word 'ns' represents 'no significant difference'.

**Supplementary Table S4. Microarray-based fold changes of ABA biosynthesis and ABA dependent gene expression between WT and *VaNAC26*-OE lines.**

| AGI                           | Gene Symbol | OE 0d vs WT 0d | OE 5d vs WT 5d | AGI       | Gene Symbol | OE 0d vs WT 0d | OE 5d vs WT 5d |
|-------------------------------|-------------|----------------|----------------|-----------|-------------|----------------|----------------|
| <i>ABA biosynthesis genes</i> |             |                |                | At4g21440 | ATMYB102    | 1.6021         | 1.2396         |
| At4g18350                     | NCED2       | 1.2231         | 1.1054         | At3g06490 | MYB108      | 0.9918         | 0.9398         |
| At3g14440                     | NCED3       | 1.1635         | 0.981          | At5g67300 | MYBR1       | 0.9365         | 0.8387         |
| At1g30100                     | NCED5       | 1.1061         | 0.8603         | At4g28110 | AtMYB41     | 0.8697         | 1.1997         |
| At3g24220                     | NCED6       | 1.1274         | 1.1122         | At1g52890 | ANAC019     | <b>2.772</b>   | 1.0669         |
| At1g78390                     | NCED9       | 0.9179         | 0.9968         | At3g15500 | ANAC055     | 0.831          | 1.2371         |
| At5g67030                     | ABA1        | 1.3294         | 0.7967         | At1g01720 | ATAF1       | 0.9608         | 0.9888         |
| At1g52340                     | ABA2        | 1.1299         | 1.1038         | At3g15510 | ATNAC2      | 0.7931         | 1.3876         |
| At2g27150                     | AAO3        | 0.9799         | 0.7028         | At1g69600 | ZFHD1       | 0.9827         | 1.6189         |
| <i>ABA-dependent genes</i>    |             |                |                | At5g65310 | ATHB5       | 0.8545         | 1.336          |
| At1g49720                     | ABF1        | 1.3823         | 1.3075         | At2g22430 | ATHB6       | 1.3481         | 1.002          |
| At4g34000                     | ABF3        | 1.0401         | 0.815          | At2g46680 | ATHB-7      | 1.4103         | <b>2.0838</b>  |
| At3g19290                     | ABF4        | 0.8286         | 0.9157         | At3g61890 | ATHB-12     | 1.219          | 1.591          |
| At5g51990                     | CBF4        | 0.9459         | 0.9606         | At1g32640 | MYC2        | <b>2.4517</b>  | 1.0255         |
| At5g05410                     | DREB2A      | 0.8333         | 0.8343         | At2g46510 | ATAIB       | 1.1979         | 1.012          |
| At1g43160                     | RAP2.6      | <b>2.7856</b>  | 0.2972         | At3g19580 | AZF2        | 0.8282         | 1.1096         |
| At3g20310                     | ERF7        | 1.0464         | 1.1586         | At4g17870 | SAZ         | 0.9039         | 1.289          |
| At5g19330                     | ADAP        | 0.9306         | 1.0126         | At1g54160 | NF-YA5      | 1.0805         | 1.0221         |
| At2g47190                     | MYB2        | 1.3774         | 0.7904         | At2g33380 | RD20        | <b>3.0546</b>  | 1.3497         |
| At5g62470                     | MYB96       | 1.13           | 1.3141         | At4g27410 | RD26        | 1.0585         | 1.1467         |

The numbers in red represent the fold change of upregulated genes (fold change >2).

|               |                                                                                                                           |     |
|---------------|---------------------------------------------------------------------------------------------------------------------------|-----|
| VaNAC26       | ATGGATGGAAGAGCAGCTCTCAACTTCCTCCCGGTTTTAGATTCCATCCCACCGACGAGGAACATCATGTATTACCTCAAAAACCAAGCCACTTCCAAGCCATGCCCGTATCCATT      | 120 |
| VvNAC26_Pinot | ATGGATGGAAGAGCAGCTCTCAACTTCCTCCCGGTTTTAGATTCCATCCCACCGACGAGGAACATCATGTATTACCTCAAAAACCAAGCCACTTCCAAGCCATGCCCGTATCCATT      | 120 |
| Consensus     | atggatggaagaagcagctctcaacttctcccggttttagattcca cccacccgacgaggaactcatcatgtattacctcaaaaaccaagccacttccaagccatgcccgatcccaatt  |     |
| VaNAC26       | ATCCCCGAAGTGGATATCTACAAATTCGAGCCTTGGGAATTCCTGAGAAGCGCGAATTTGGAGAAAATGAGTGGTATTTCTTAGCCCGCGTGACCSTAAGTATCCCAATGGGGCTAGA    | 240 |
| VvNAC26_Pinot | ATCCCCGAAGTGGATATCTACAAATTCGAGCCTTGGGAATTCCTGAGAAGCGCGAATTTGGAGAAAATGAGTGGTATTTCTTAGCCCGCGTGACCSTAAGTATCCCAATGGGGCTAGA    | 240 |
| Consensus     | atccccgaagtggatattctacaaattcgagccttgggaatttcctgagaagcgcgaaatgggagaaaatgagtggatattcttagcccgcgtagaccstaagtatcccaatggggctaga |     |
| VaNAC26       | CCCAACCGAGCTACAGTGTCCGGCTACTGAAAGCCACAGGGACAGACAAGCAATCTACAGTGGGGCTAAGTATGTGGGGTGAAAAAGGCTCTTGTGTCTACAAGGGTAGGCCCTCT      | 360 |
| VvNAC26_Pinot | CCCAACCGAGCTACAGTGTCCGGCTACTGAAAGCCACAGGGACAGACAAGCAATCTACAGTGGGGCTAAGTATGTGGGGTGAAAAAGGCTCTTGTGTCTACAAGGGTAGGCCCTCT      | 360 |
| Consensus     | cccaaccgagctacagtggtccggctactgaaagccacagggacagacaagcaatctacagtggggctaagtatgtggggtgaaaaaggctcttgtgtctacaagggtaggacctct     |     |
| VaNAC26       | AAGGGCATTAAAGCCGATTGGATTATGCATGAATATCCCTTAGTGATTCAAGGCCACGCCCAAGAGCAATGGTTCATGAGATTGGATGATTGGTGCTATGAGGATCTATAAG          | 480 |
| VvNAC26_Pinot | AAGGGCATTAAAGCCGATTGGATTATGCATGAATATCCCTTAGTGATTCAAGGCCACGCCCAAGAGCAATGGTTCATGAGATTGGATGATTGGTGCTATGAGGATCTATAAG          | 480 |
| Consensus     | aagggcattaagccgattggattatgcataatctcccttagtgattcaagggcacgcccaagagcaatggttccatgagattggatgattgggtgctatgaggatctataag          |     |
| VaNAC26       | AGCAGCATGTGGGAGAAATTTGGAGAGCAAGCAAGAAATTTAGTCCCGAAATACCCCTTACAAATCAGATGATGGCGGTGAGCAGCACCTGTGAAATTTCCAGCACTTTTTC          | 600 |
| VvNAC26_Pinot | AGCAGCATGTGGGAGAAATTTGGAGAGCAAGCAAGAAATTTAGTCCCGAAATACCCCTTACAAATCAGATGATGGCGGTGAGCAGCACCTGTGAAATTTCCAGCACTTTTTC          | 600 |
| Consensus     | aagacgatgtgggagaaatttggagagcaagcaagaaattagtcccgaaataccccttacaaatcagatgatggcggtgagcagcacctgtgaaatttccagcactttttcc          |     |
| VaNAC26       | CTTGCTCMTTATTGGACATGGAAATCTGGGTCCAAATTCACAACTTCTAGTGTGACAAATTCATACCATTCAGCCTTTGATTTCCAGGSCACCATAGCAATATTGCCGGAACCGACCCG   | 720 |
| VvNAC26_Pinot | CTTGCTCMTTATTGGACATGGAAATCTGGGTCCAAATTCACAACTTCTAGTGTGACAAATTCATACCATTCAGCCTTTGATTTCCAGGSCACCATAGCAATATTGCCGGAACCGACCCG   | 720 |
| Consensus     | cttgctcmttattggacatggaaatctgggtccaaattcacaaacttctagtgtagcaaatcctacccattcagcctttgatttccaggscaccatagcaatattgccggaaaccgacccg |     |
| VaNAC26       | CCTGGCGTGGCAAAATTCGAGTTATTCCAACTGCCATGCCAATACAACGATTCAACCAAGTCCAAAGTGAATCAGAATCAGATTCGAAACCGCCTCTATTGTGAACCCAGTGTATGAA    | 840 |
| VvNAC26_Pinot | CCTGGCGTGGCAAAATTCGAGTTATTCCAACTGCCATGCCAATACAACGATTCAACCAAGTCCAAAGTGAATCAGAATCAGATTCGAAACCGCCTCTATTGTGAACCCAGTGTATGAA    | 840 |
| Consensus     | cctggcgtggcaaaattcgagttatccaaactgccatgccaatacaacgattcaaccaagtccaaagtgaatcagaatcagatccgaaaccgcctctattgtgaacccagtgatgaa     |     |
| VaNAC26       | TTTCAGTGT                                                                                                                 | 848 |
| VvNAC26_Pinot | TTTCAGTGT                                                                                                                 | 848 |
| Consensus     | tttcagtg                                                                                                                  |     |

**Supplementary Figure S1. Comparisons of CDS regions between *Va*NAC26 and *Vv*NAC26 (from ‘Pinot Noir’).**

A

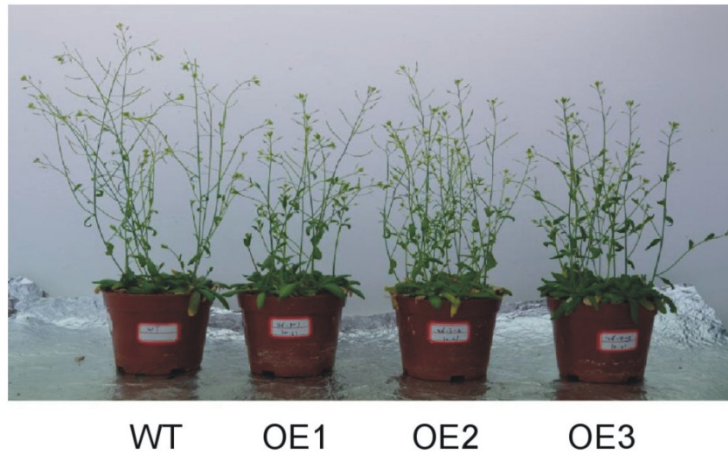

B

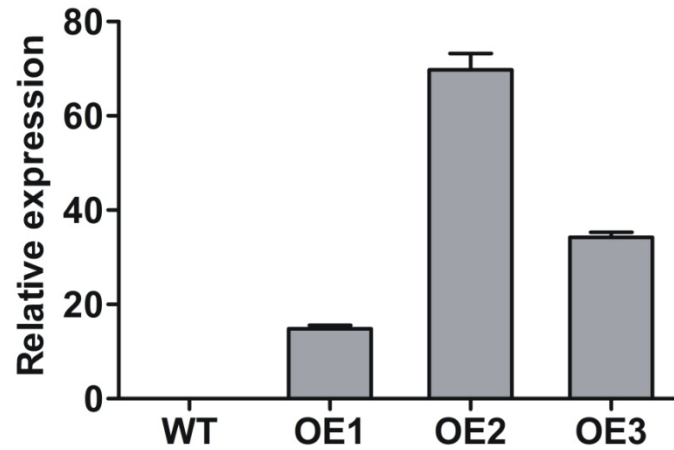

**Supplementary Figure S2. Growth conditions and expression detection of *VaNAC26* in WT and transgenic Arabidopsis.**

A: Growth of transgenic Arabidopsis shows identical phenotype at the same developmental stage. B: qRT-PCR detections of *VaNAC26* in WT and three *VaNAC26*-transgenic lines. The values represent the mean value  $\pm$  SE from three replicates.



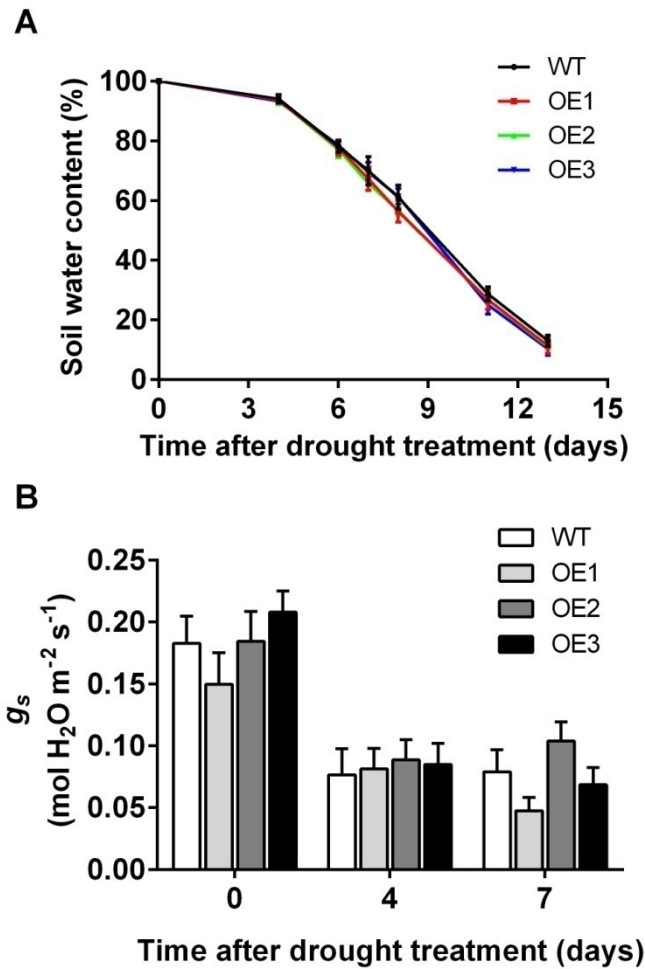

**Supplementary Figure S3. Soil water content and stomatal conductance in WT and *VaNAC26*-OE lines under drought treatments.**

Soil water content (A) was detected at different designated time intervals during drought treatments: 4 d (mild water stress), 6, 7, 8 d (moderate water stress), 11 and 13 d (severe water stress). Stomatal conductance ( $g_s$ , B) of expanded leaves was measured at 0, 4, and 7 d of drought treatment. The values in A and B represent the mean value  $\pm$  SE from four and six replicates, respectively.

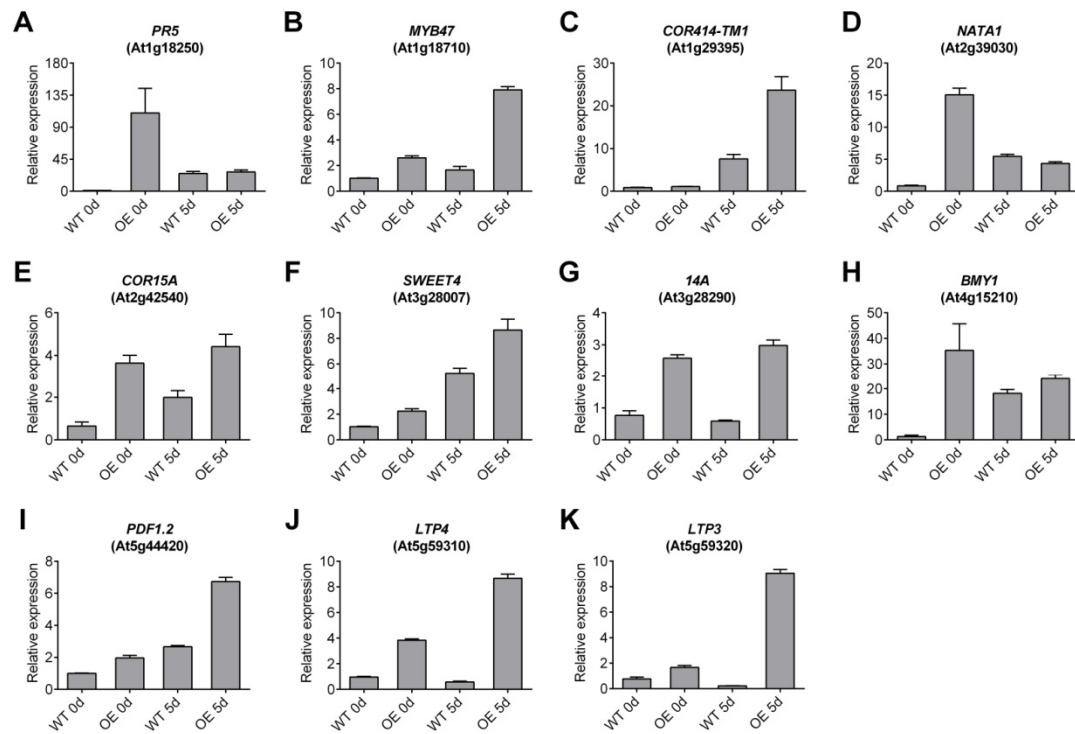

**Supplementary Figure S4. Expression patterns of 11 putative *VaNAC26* downstream genes by qRT-PCR analysis.**

Relative expressions of *PR5* (A), *MYB47* (B), *COR414-TM1* (C), *NATA1* (D), *COR15A* (E), *SWEET4* (F), *14A* (G), *BMY1* (H), *PDF1.2* (I), *LTP4* (J) and *LTP3* (K) in WT and OE lines before (WT 0d and OE 0d) and 5 d after water stress (WT 5d and OE 5d), respectively. The values represent the mean value  $\pm$ SE from three replicates.
